# Supplementary material for: Reversible Transitions in a Cellular Automata‐Based Traffic Model with Driver Memory
Source: Hindawi journal article supplement (doi:10.1155/2019/1956521), 2019-01-01
Supplement: f1 [file 1956521.f1.docx]

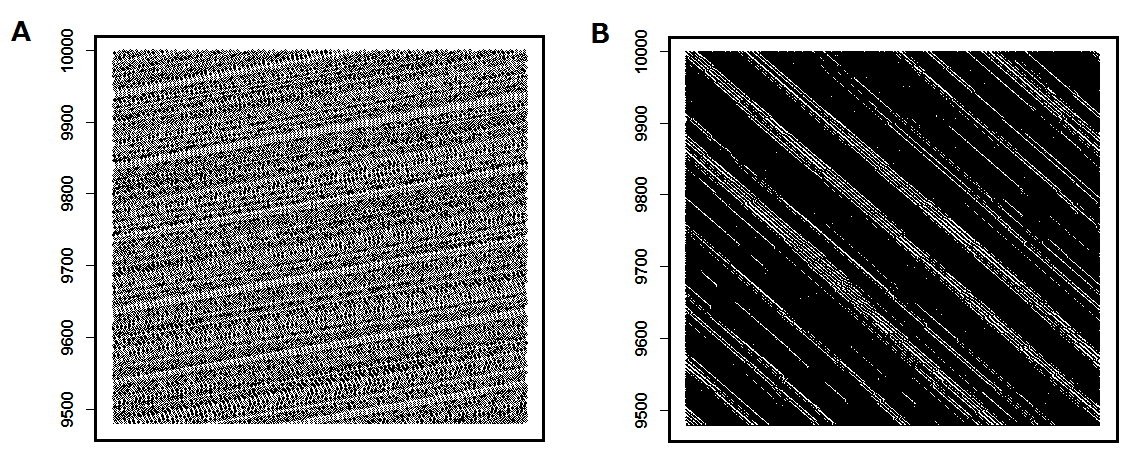


Figure S1. Illustrations of vehicle positions for the harsh model. Here, the vertical and horizontal axes indicate the time step and vehicle position, respectively, and each vehicle is shown as a black dot. Here, the vehicle densities are A. 0.10 and B. 0.50, and *p =* 0.01, *v*max = 5, and *threshold_acceleration* = 15.


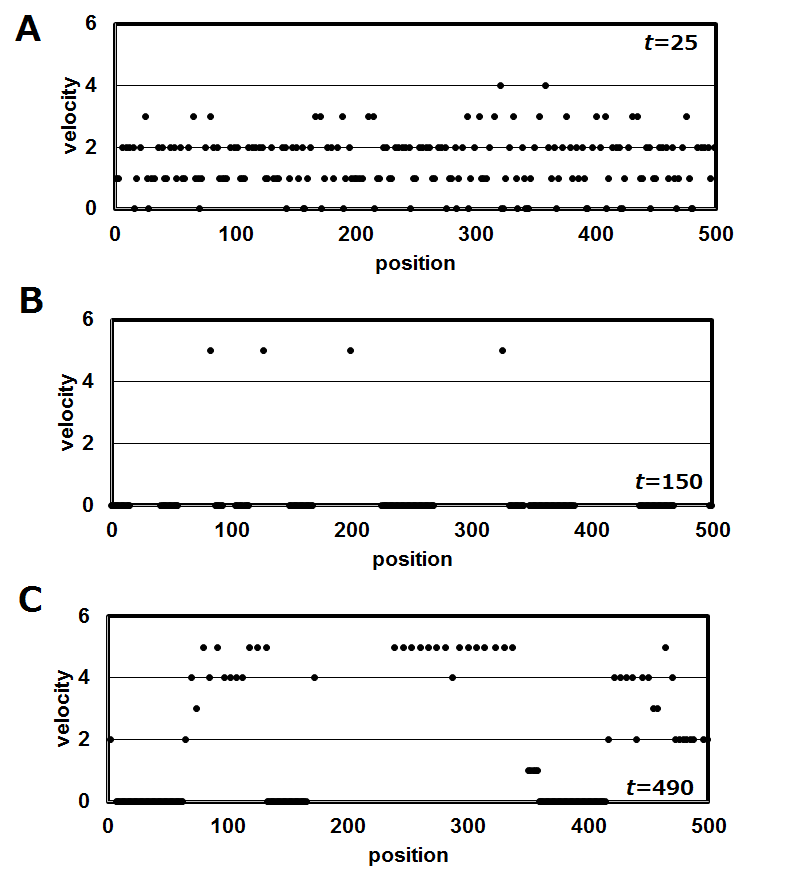


Figure S2. Relationship between the vehicle velocity and position at a particular time step. Here, the data was obtained from one trial using the multi-state NS model with a vehicle density of 0.40.


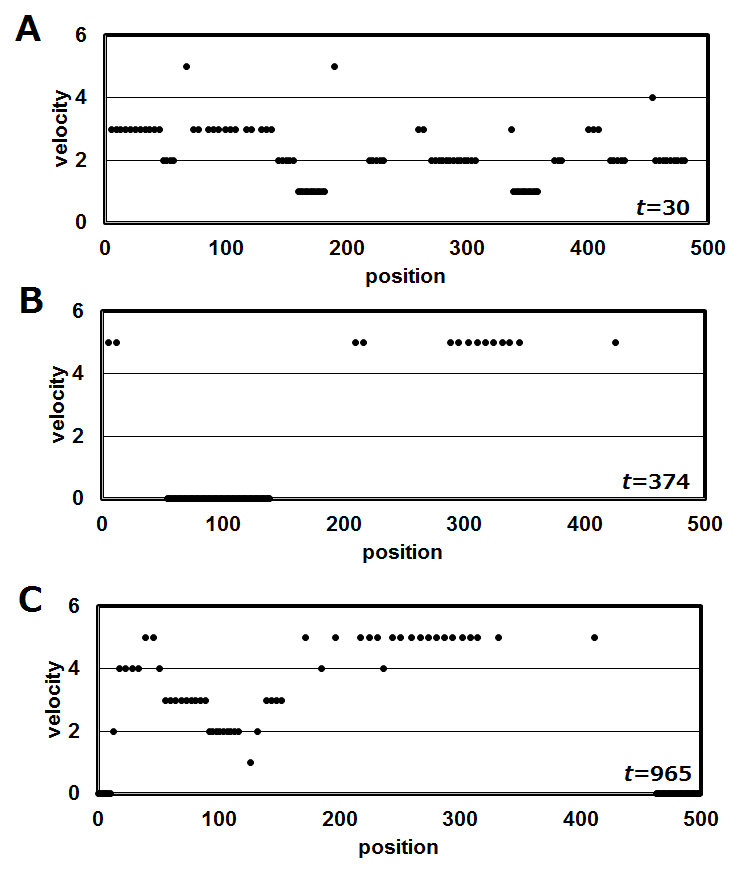


Figure S3. Relationship between the vehicle velocity and position at a particular time step. Here, the data was obtained from one trial using the multi-state NS model with a vehicle density of 0.20.


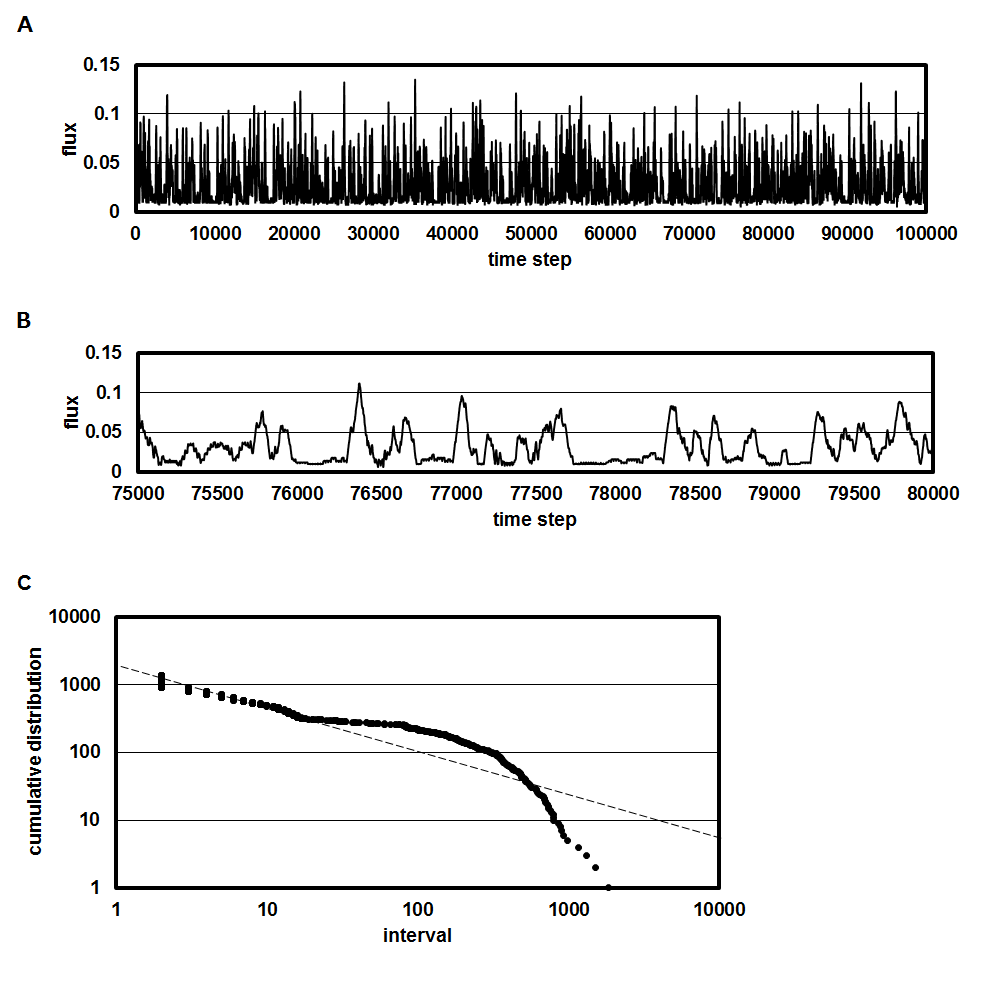


Figure S4. Flux properties for a vehicle density of 0.20. A. Changes in the flux over 100,000 time steps. B. Subset of the data in A. C. Cumulative distribution of the intervals between extreme jams. Here, *p =* 0.01, *v*max = 5, *threshold_slow =* 5, and *threshold_acceleration* = 15.


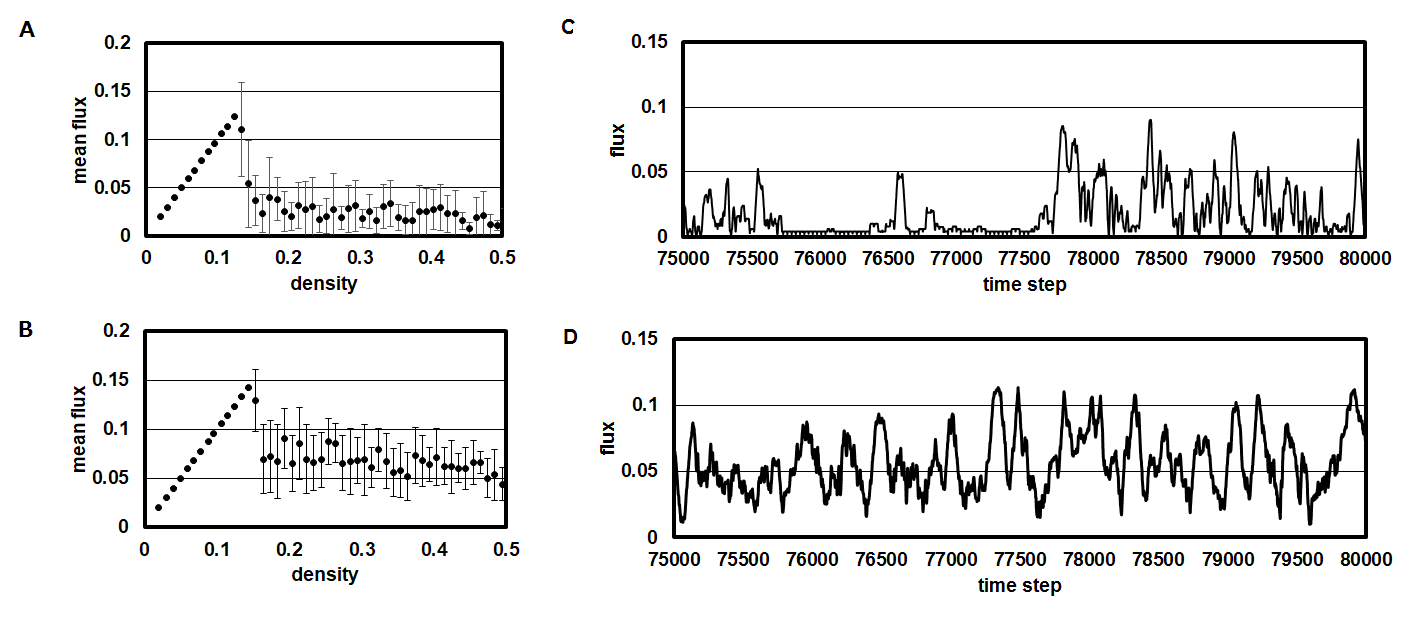


Figure S5. Flux–vehicle density relationships and flux changes over time for different thresholds. Here, *p* = 0.01 and *v*max = 5. A. Flux–density relationship for *threshold_slow =* 10 and *threshold_acceleration =* 30. B. Flux–density relationship for *threshold_slow =* 10 and *threshold_acceleration =* 10. C. Flux changes over time for *threshold_slow =* 10 and *threshold_acceleration =* 30. D. Flux changes over time for *threshold_slow =* 10 and *threshold_acceleration =* 10. The average data from 10 trials over 10,000 time steps are plotted in A and B, while partial data from one trial over 100,000 time steps are plotted in C and D. The vertical bars indicate the standard deviation.

#
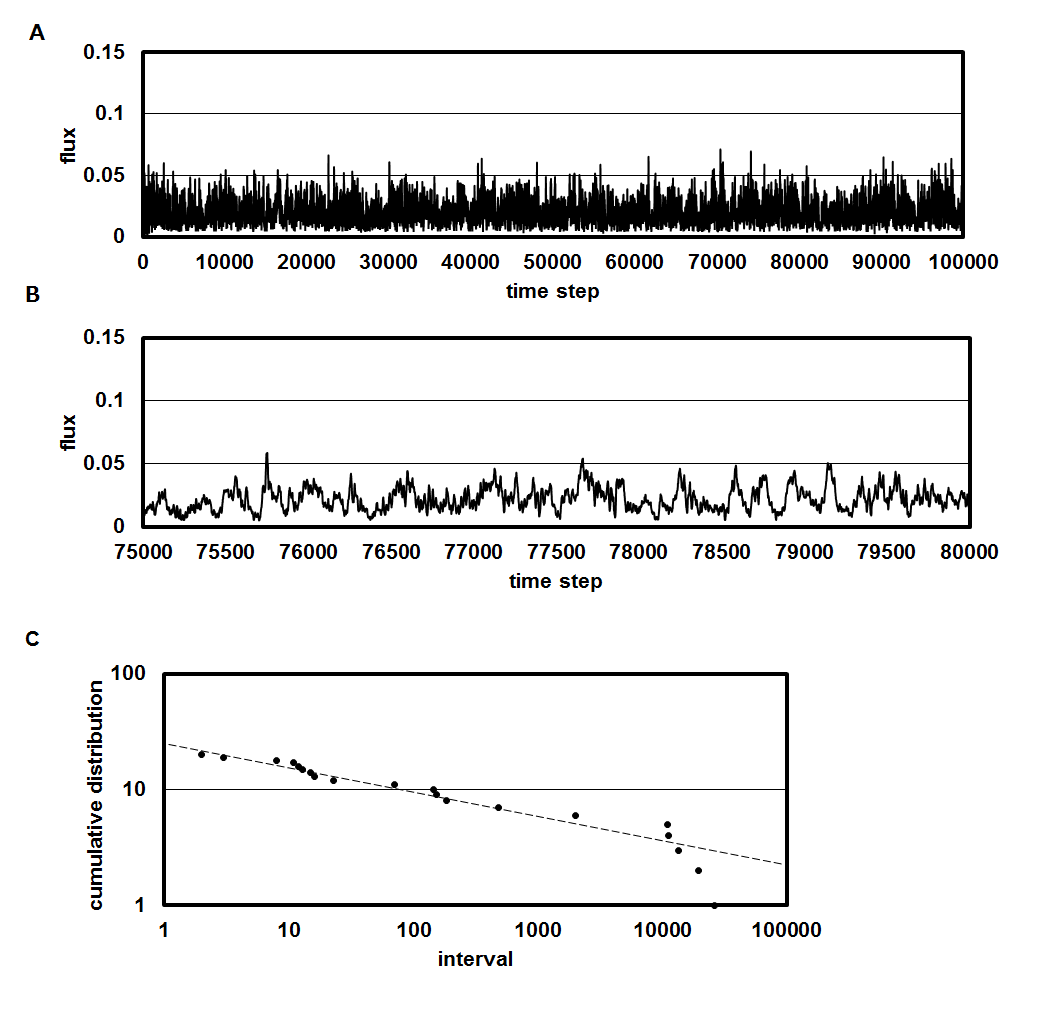


Figure S6. Flux properties for *p =* 0.1, *v*max = 5, *threshold_slow =* 5, and *threshold_acceleration* = 15. A. Changes in the flux over 100,000 time steps. B. Subset of the data in A. C. Cumulative distribution of the intervals between extreme jams.
